# Supplementary material for: A Novel Route to Manufacture 2D Layer MoS2 and g-C3N4 by Atmospheric Plasma with Enhanced Visible-Light-Driven Photocatalysis
Source: Nanomaterials (Basel). 2019 Aug 8;9(8):1139. doi: 10.3390/nano9081139 (PMC6723641; doi:10.3390/nano9081139)
Supplement: Supplementary file 1 [file nanomaterials-09-01139-s001.pdf]

# A Novel Route to Manufacture 2D Layer MoS<sub>2</sub> and g-C<sub>3</sub>N<sub>4</sub> by Atmospheric Plasma with Enhanced Visible-Light-Driven Photocatalysis

## S1. Dielectric Barrier Discharge Plasma Treatment

The DBD reactor contains two quartz plate (2 mm in thick and 60 mm in diameter) and one quarter ring (50 mm in diameter) as barrier. The schematic representation of the DBD plasma setup can be found in Figure S1. The sample was loaded on the quartz plate and then placed between the two electrodes of the DBD plasma generator. The DBD plasma was generated by a high voltage generator (CTP-2000K; Corona Laboratory, Nanjing, China), which can supply a voltage from 0 to 30 kV with a sinusoidal waveform at a frequency of about 22 kHz.

The chamber was cooled to room temperature and detached from the electrodes. One time DBD operation proceeded for 3 min to restrict the heat effect, followed by manually stirring to expose the untreated samples outside. The operation was repeated for 20 times, until total DBD treatment time was 1 h. The temperature of the DBD was measured by infrared imaging (Ircon, 100PHT), and indicated that the treatment occurred at moderate temperature (Figure S2).

The voltage and current were respectively measured using a digital oscilloscope (Tektronix TBS1102B) with a high-voltage probe and a current transformer built into the high voltage generator. The appearance of current pulses implied the generation of a typical DBD.

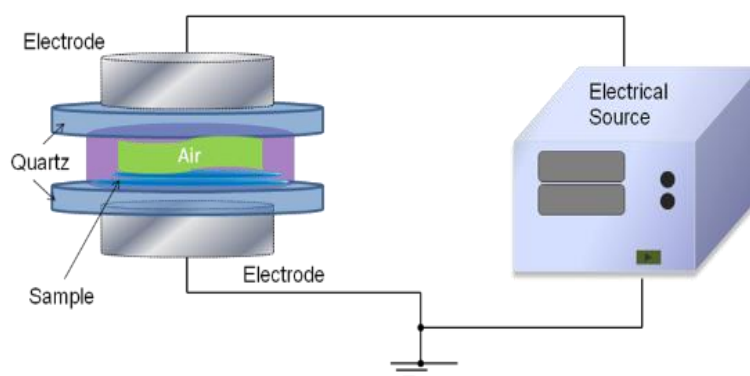

Figure S1. Schematic of DBD plasma system.

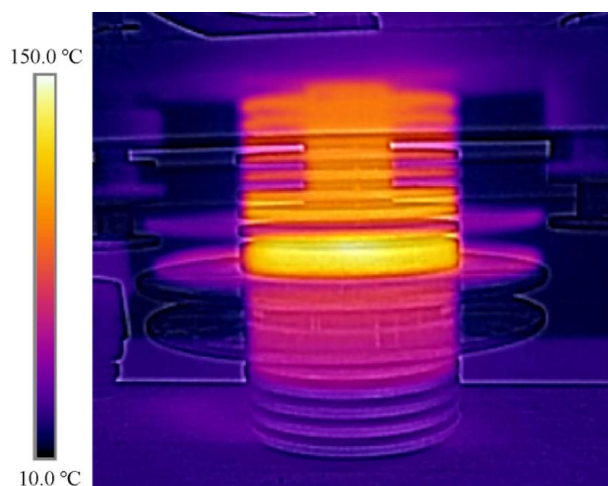

Figure S2. IR image of the reaction system during DBD treatment.

## S2. Synthesis bulk MoS<sub>2</sub> and bulk g-C<sub>3</sub>N<sub>4</sub>.

### Synthesis bulk MoS<sub>2</sub>.

0.5 g of (NH<sub>4</sub>)<sub>2</sub>MoS<sub>4</sub> powder was placed in a quartz boat, placed together in the center of a quartz tube of a tube furnace, heated at a rate of 5 °C/min to 500 °C for two hours. The atmosphere was Ar/H<sub>2</sub>. Finally, the black powder was collected after dropped to room temperature.

### Synthesis of bulk g-C<sub>3</sub>N<sub>4</sub>.

10g melamine powder was heated at 550 °C for 2 h in static air with a heating rate of 5 °C/min, the resultant yellow agglomerates were milled into powder in a agate mortar.

## S3. Image of MoS<sub>2</sub> and g-C<sub>3</sub>N<sub>4</sub> powders.

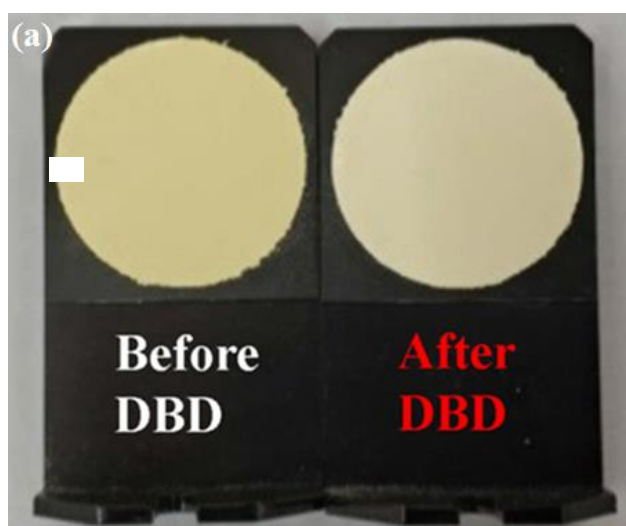

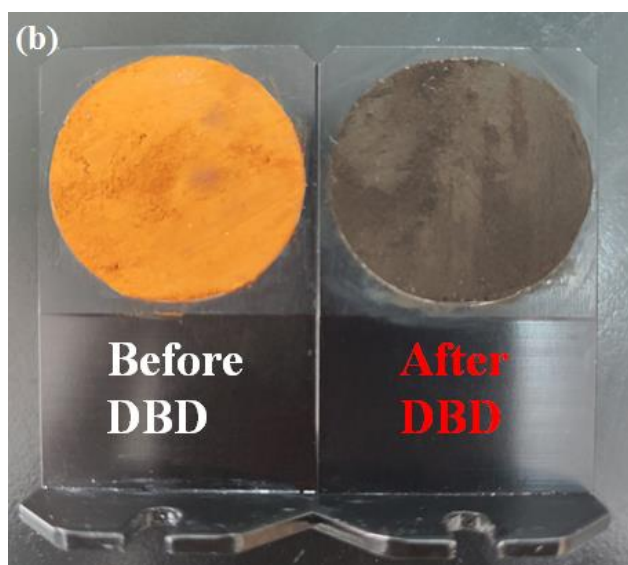

**Figure S3.** Image of (a) g-C<sub>3</sub>N<sub>4</sub> and (b) MoS<sub>2</sub> before DBD treatment and after DBD treatment. Note: The as-obtained samples have obvious differences before and after plasma treatment.

#### S4. XPS survey spectra of (a) MoS<sub>2</sub> and (b) g-C<sub>3</sub>N<sub>4</sub>.

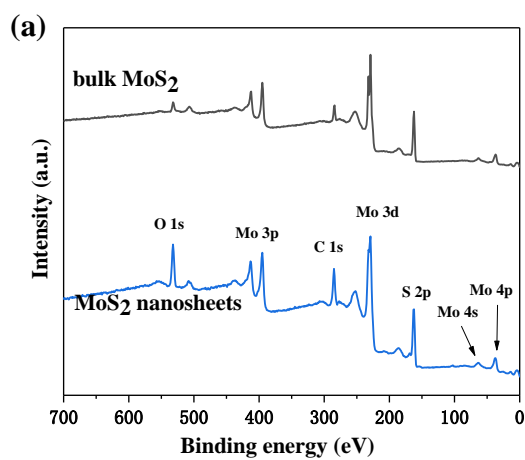

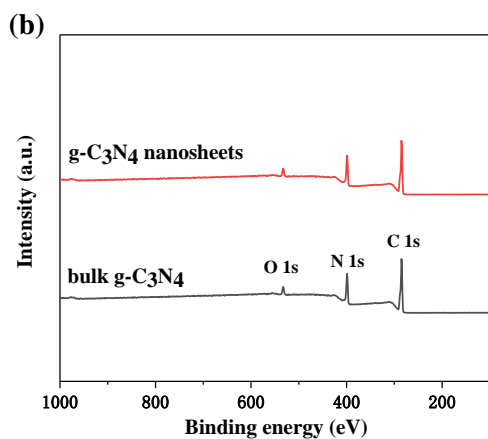

**Figure S4.** XPS survey spectra of (a) MoS<sub>2</sub> and (b) g-C<sub>3</sub>N<sub>4</sub>.

S5. The atomic concentration of all elements in (a) MoS<sub>2</sub> and (b) g-C<sub>3</sub>N<sub>4</sub>.

Table S1. The atomic concentration of all elements in MoS<sub>2</sub>.

| Atomic %                    | Mo    | S     | C     | O    |
|-----------------------------|-------|-------|-------|------|
| MoS <sub>2</sub> nanosheets | 21.97 | 43.25 | 28.30 | 6.48 |
| Bulk MoS <sub>2</sub>       | 24.09 | 46.72 | 25.53 | 3.66 |

Table S2. The atomic concentration of all elements in g-C<sub>3</sub>N<sub>4</sub>.

| Atomic %                                   | C     | N     | O    |
|--------------------------------------------|-------|-------|------|
| g-C <sub>3</sub> N <sub>4</sub> nanosheets | 71.81 | 23.31 | 4.88 |
| Bulk g-C <sub>3</sub> N <sub>4</sub>       | 72.37 | 23.56 | 4.07 |

S6. FT-IR of bulk g-C<sub>3</sub>N<sub>4</sub> and g-C<sub>3</sub>N<sub>4</sub> nanosheets.

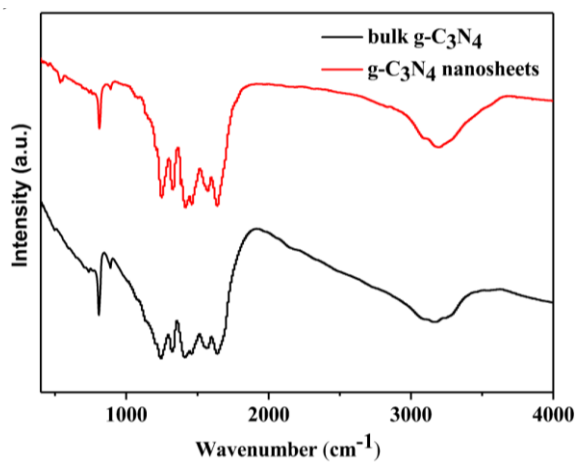

**Figure S5.** FTIR spectra of bulk g-C<sub>3</sub>N<sub>4</sub> and g-C<sub>3</sub>N<sub>4</sub> nanosheets.

**S7. SEM of bulk g-C<sub>3</sub>N<sub>4</sub> and g-C<sub>3</sub>N<sub>4</sub> nanosheets.**

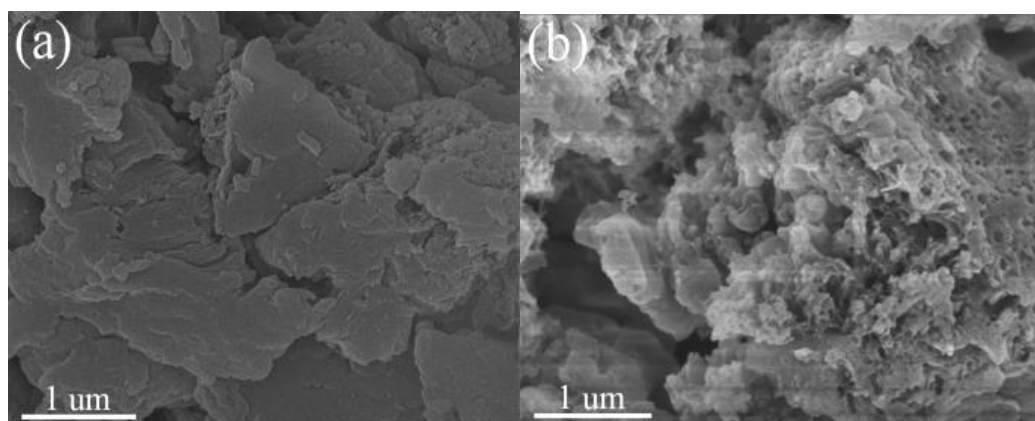

**Figure S6.** SEM of **a** bulk g-C<sub>3</sub>N<sub>4</sub> and **b** g-C<sub>3</sub>N<sub>4</sub> nanosheets.
